# Supplementary material for: Health Monitoring and Promotion Among Youths With Psychiatric Disorders: Program Development and Initial Findings
Source: Atypon-hosted journal article supplement (doi:10.1176/ps.62.11.pss6211_1331), 2011-11-01
Supplement: pss_62_11_1331_ds001.pdf [file pss_62_11_1331_ds001.pdf]

Program Implementation: Statewide Screening Rates  
(July 2009-April 2010)<sup>1</sup>

Table 1

| Screening Measure              | Jul-09 % | Oct-09 % | Jan-10 % | Apr-10 % |
|--------------------------------|----------|----------|----------|----------|
| Activity <sup>2</sup>          | 60       | 84       | 84       | 84       |
| BMI Percentile <sup>2</sup>    | 68       | 84       | 86       | 86       |
| Smoking Status <sup>3</sup>    | 86       | 83       | 84       | 85       |
| Alcohol/Substance <sup>3</sup> | 52       | 82       | 84       | 84       |
| CRAFFT <sup>*3</sup>           | 55       | 78       | 81       | 79       |

<sup>1</sup> Screening rates for youths in care at the end of the report month

<sup>2</sup> Screened on all youths

<sup>3</sup> Screened on 13-22 year old youths

\*CRAFFT is a tool consisting of 6 questions used to screen adolescents for high risk alcohol and other drug use
